# Supplementary material
Source: PubMed Central journal article supplement (PMC6432708)
Supplement: joces-132-229500-s1.pdf [file joces-132-229500-s1.pdf]

Related to figure 1 and 2.

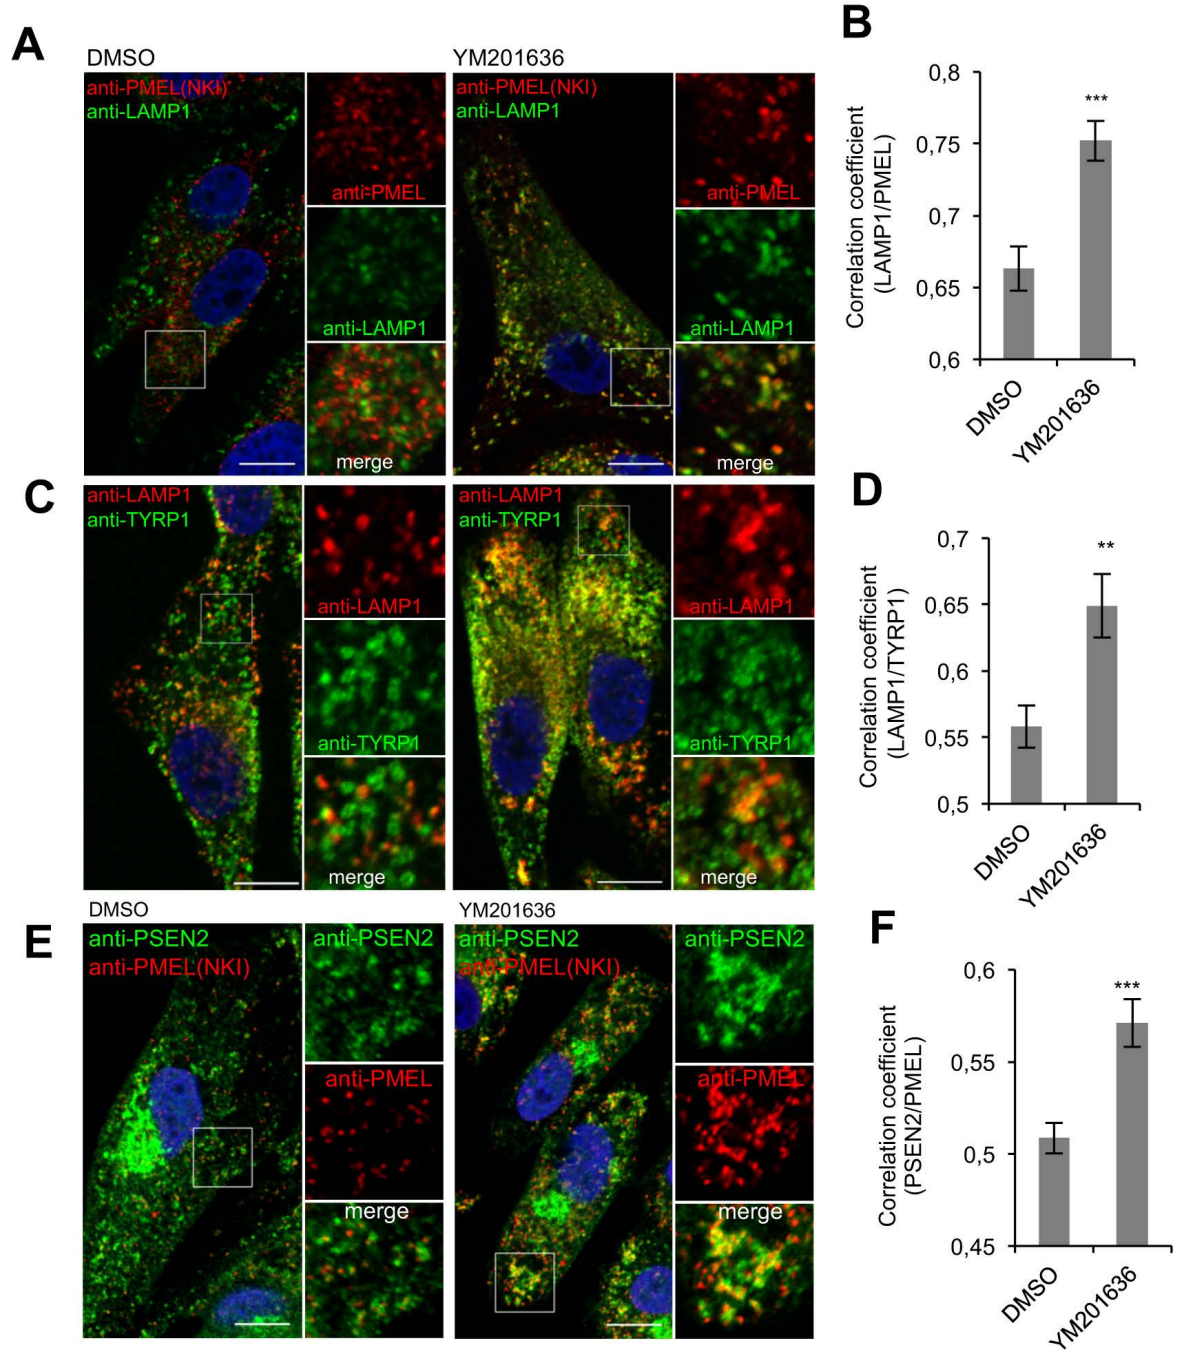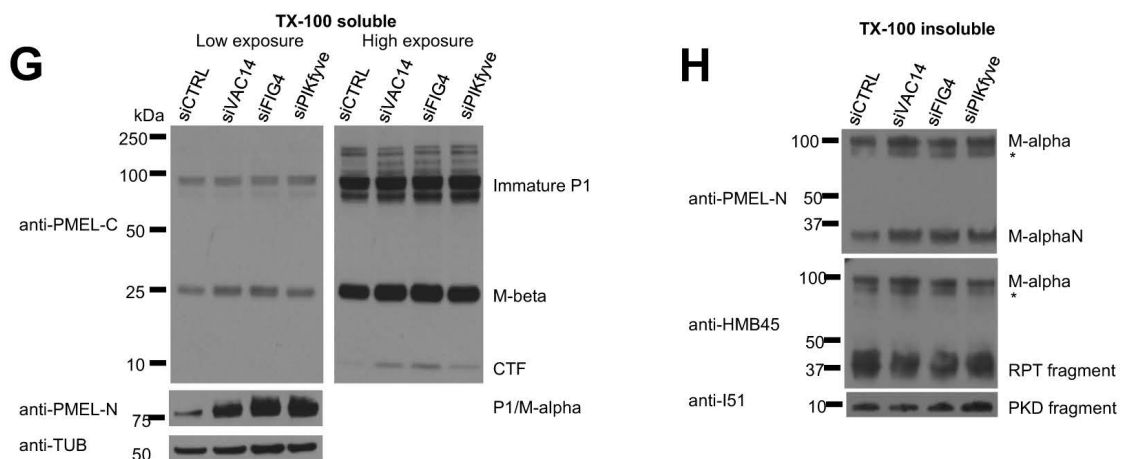

**Figure S1 related to figure 1.**

A, C, E) MNT-1 cells treated for 2 h with DMSO or 1.6  $\mu$ M YM201636 were fixed, permeabilized and immuno-labeled using anti-PMEL-NKI (red) (recognizing mainly processed PMEL in stage II melanosomes) and anti-LAMP1 (green) antibodies (A) or anti-TYRP1 (green) (a marker for pigmented melanosomes) and anti-LAMP1 (red) antibodies (C) or anti-PSEN2 (green) and anti-PMEL-NKI (red) antibodies (E). DAPI was used to stain nuclei. Panels on the right show magnifications of the boxed regions. (Scale bars: 10 $\mu$ m). B, D, F) Quantification of colocalization between LAMP1 and PMEL fluorescence (B), LAMP1 and TYRP1 fluorescence (D) and PSEN2 and PMEL fluorescence (F). G-H) Triton X-100-soluble (G) and Triton X-100-insoluble (H) lysates of MNT-1 cells treated with control siRNAs or siRNAs against VAC14, FIG4 and PIKfyve were analyzed by immunoblotting using antibodies against the PMEL C-terminus (anti-PMEL-C), the PMEL N-terminus (anti-PMEL-N), the PMEL RPT domain (anti-PMEL-HMB45), the PMEL PKD domain (anti-PMEL-I51) and Tubulin (anti-TUB) as equal loading marker. The different PMEL fragments are annotated on the right. Stars indicate M-alpha fragments derived from another isoform generated by alternative splicing. Right panels show higher exposures. Data are represented as mean  $\pm$  SEM.

Related to figure 3

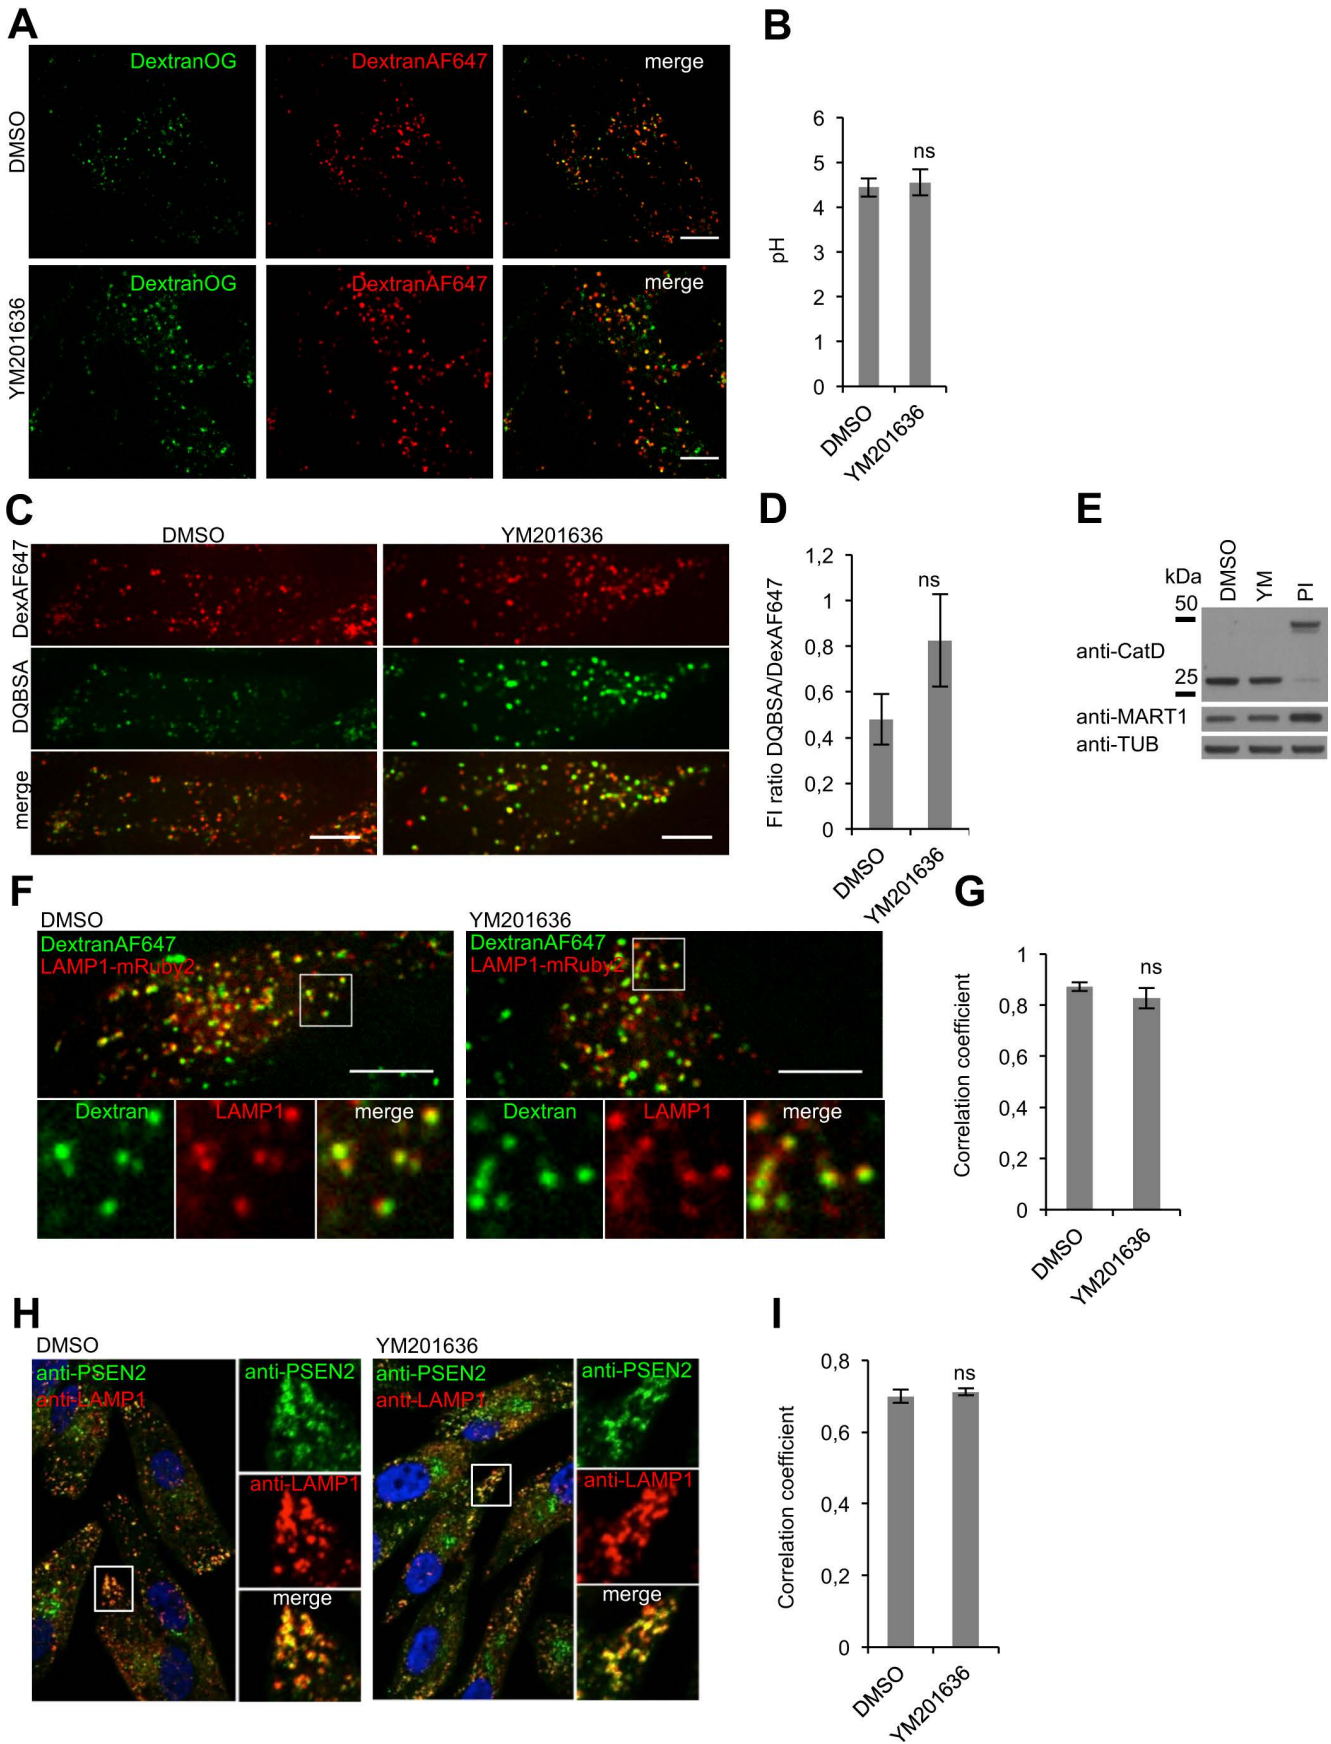

**Figure S2 related to figure 3.**

A) Endolysosomal pH of mock and 1.6  $\mu$ M YM201636 treated cells measured by ratiometric fluorescence imaging using internalized pH-sensitive DextranOregon green (Dextran OG) and pH-insensitive DextranAF647. B) Quantification of the pH, measured by ratiometric fluorescence of Dextran OG and DextranAF647. C) MNT-1 cells were pre-treated with DMSO or 1.6  $\mu$ M YM201636 for 2 h and then Dextran-AF647 (DexAF647) and DQ-BSA green were co-internalized by 2 h pulse and 1 h chase. Snapshots of live cells were taken at a spinning disc microscope. Green fluorescence indicates proteolytic cleavage of DQ-BSA, while the red fluorescence of DexAF647 serves as a fluid phase marker. (Scale bars: 10 $\mu$ m). D) Quantification of the fluorescence ratio between DQBSA and DexAF647 in C). E) Immuno-blot analysis of MNT-1 cells treated for 24 h with DMSO, 1.6  $\mu$ M YM201636 or a protease inhibitor mixture (100  $\mu$ M leupeptin, 10  $\mu$ M pepstatin A and 10  $\mu$ M E-64d) using antibodies against CathepsinD (CatD), MART1 and Tubulin. F) LAMP1-mRuby2 expressing MNT-1 cells were treated for 2 h with 1.6  $\mu$ M YM201636 or DMSO and then DextranAF647 was internalized by 2 h pulse and 1 h chase in the presence of YM201636 or DMSO. Lower panels show magnifications of the boxed regions. G) Quantification of colocalization between DextranAF647 and LAMP1-mRuby2 fluorescence. (Scale bars: 10 $\mu$ m). H) MNT-1 cells treated for 2 h with DMSO or 1.6  $\mu$ M YM201636 were fixed, permeabilized and immuno-labeled using anti-LAMP1 (green) antibodies and anti-PSEN2 antibodies (red). I) Quantification of colocalization between LAMP1 and PSEN2 fluorescence. Data are represented as mean  $\pm$  SEM.

Related to figure 3

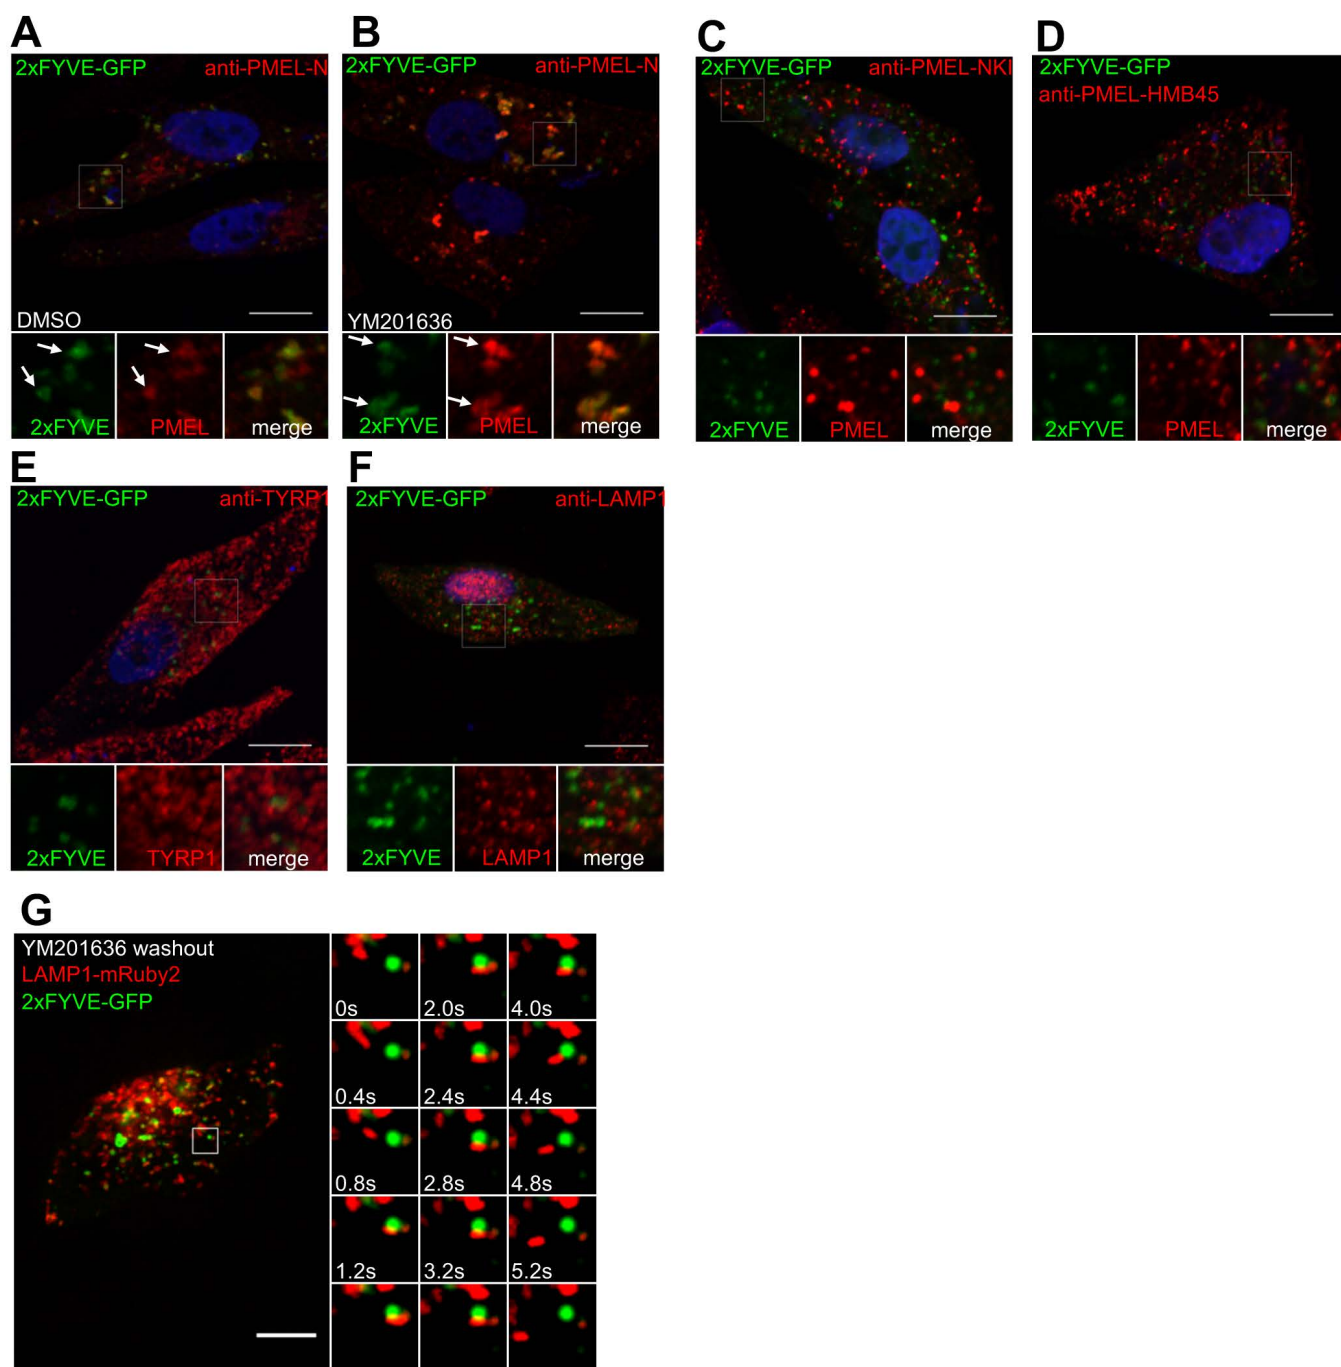

**Figure S3 related to figure 3.**

A-B) MNT-1 cells expressing 2xFYVE-GFP (green) were treated for 2 h with DMSO A) or YM201636 B), fixed, permeabilized and immuno-labeled using anti-PMEL-N antibody (red) and DAPI (blue) to stain nuclei. C-F) MNT-1 cells expressing 2xFYVE-GFP (green) were fixed, permeabilized and immuno-labeled using anti-PMEL-NKI C), anti-PMEL-HMB45 D), anti-TYRP1 E) and anti-LAMP1 F) antibodies (red) and DAPI (blue) to stain nuclei. Lower panels show magnifications of the boxed regions. (Scale bars: 10 $\mu$ m). G) MNT-1 cells were co-transfected with LAMP1-mRuby2 (red) and 2xFYVE-GFP (green), to mark endolysosomes and stage I melanosomes, respectively. After cells were treated for 2 h with 1.6  $\mu$ M YM201636 and subsequently YM201636 was washed out for 1 h. Movies were taken at a frame rate of 0.4 s by spinning disc microscopy. The left panels show the first frame of the movies. The right panels show stills of the magnified regions. (Scale bars: 10  $\mu$ m).

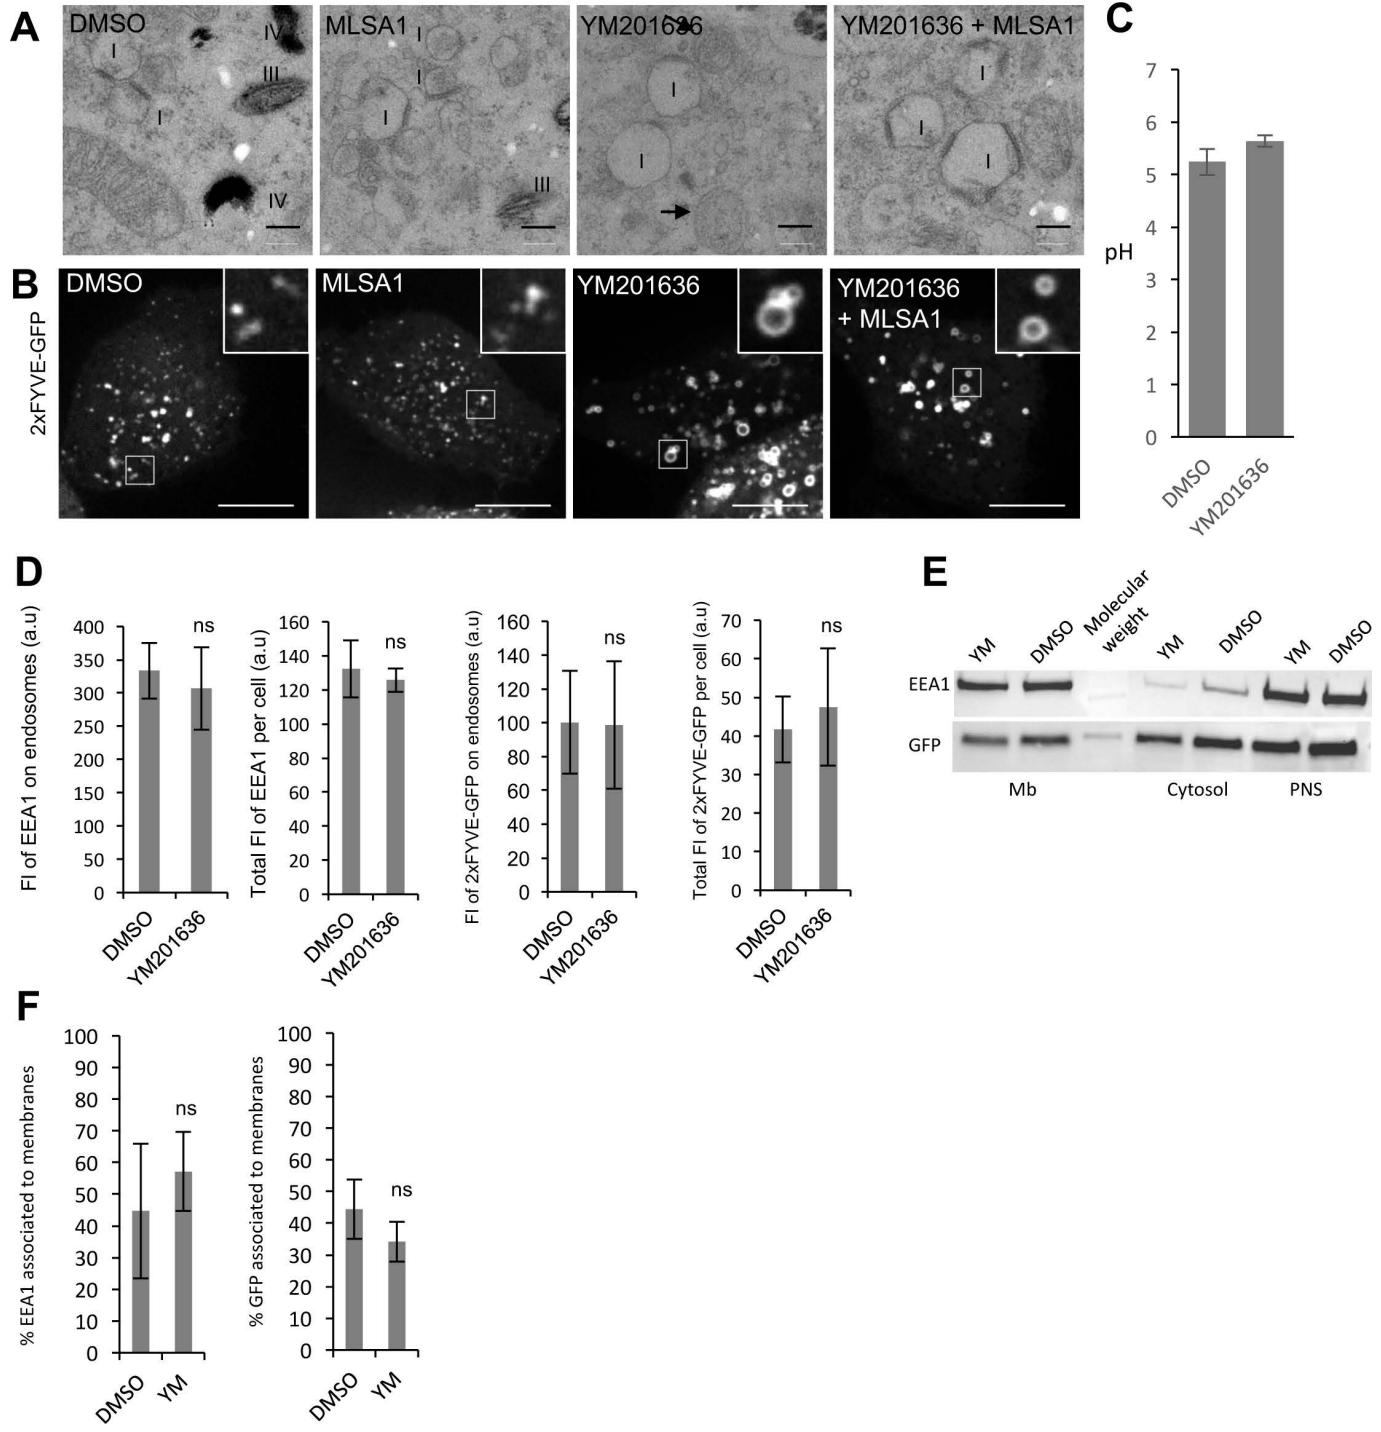

**Figure S4 related to figure 6.**

A) EM analysis of MNT-1 cells treated for 24 h with DMSO or 1.6  $\mu$ M YM201636, 100  $\mu$ M MLSA-1 or 1.6  $\mu$ M YM201636 + 100  $\mu$ M MLSA-1. "I" marks stage I melanosomes and Arrows highlight aberrant unpigmented melanosomes containing unstructured aggregates. (Scale bars: 200 nm). B) Snapshots live 2xFYVE-GFP transfected MNT-1 cells treated for 2 h with DMSO, 1.6  $\mu$ M YM201636, 100  $\mu$ M MLSA-1 or 1.6  $\mu$ M YM201636 + 100  $\mu$ M MLSA-1. Magnifications of the boxed regions illustrate morphology and size of 2xFYVE-GFP compartments (Scale bars: 10  $\mu$ m). C) MNT1 cells were treated for 2 h with 1.6  $\mu$ M YM201636 or DMSO. Dextran-OregonGreen (DextranOG) (green) and DextranAF647 (red) were co-internalized by 5 minutes pulse and 8 minutes chase into stage I melanosomes. The pH of mock and 1.6  $\mu$ M YM201636 treated cells is measured by ratiometric fluorescence imaging using internalized pH-sensitive DextranOregon green and pH-insensitive DextranAF647. D) Quantification of mean fluorescence intensity (FI) of EEA1 (Figure 3E) and 2xFYVE-GFP (Figure 5A) on endosomes and in total cell after 2h of DMSO or YM201636 treatment. E-F) Cytosol-membrane fractions of MNT-1 cells treated with DMSO or 1.6  $\mu$ M YM201636. The membrane fraction (Mb), cytosol and Post Nuclear Supernatant (PNS) containing both membranes and cytosol, were immunoblotted using antibodies against EEA1 or GFP to detect 2XFYVE-GFP. F) Quantification of the mean intensity of EEA1 or GFP on membranes.



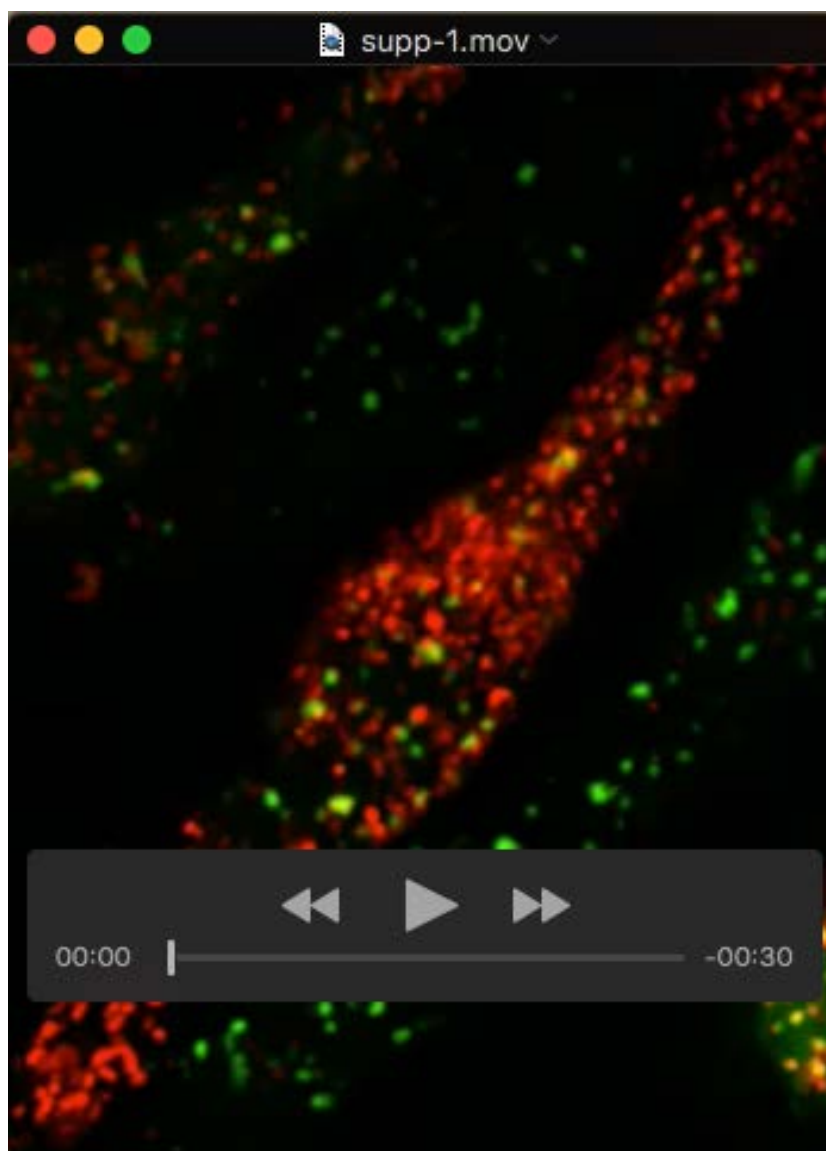

**Movie 1 (related to Figure 3I).**

MNT-1 cells were co-transfected with LAMP1-mRuby2 and 2xFYVE-GFP and treated for 2 h with DMSO. The movie was taken at 0.4 sec frame rate and 300 frames are shown.

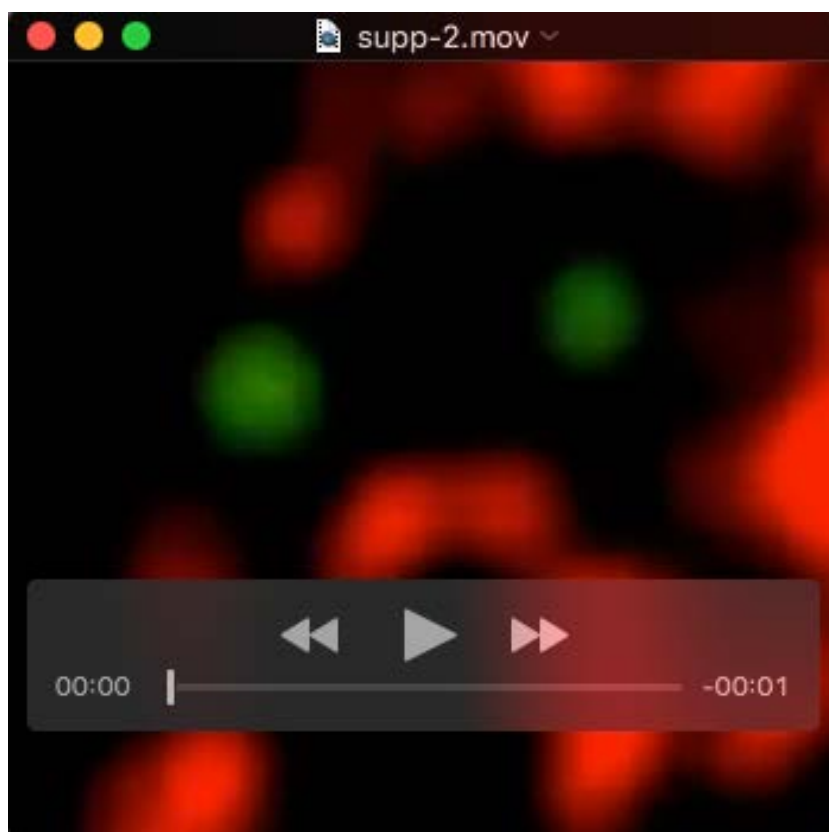

**Movie 2 (related to Figure 3I).**

MNT-1 cells were co-transfected with LAMP1-mRuby2 and 2xFYVE-GFP and treated for 2 h with DMSO. Movie shows magnification of boxed region in Figure 3I. The movie was taken at 0.4 sec frame rate and 10 frames are shown.

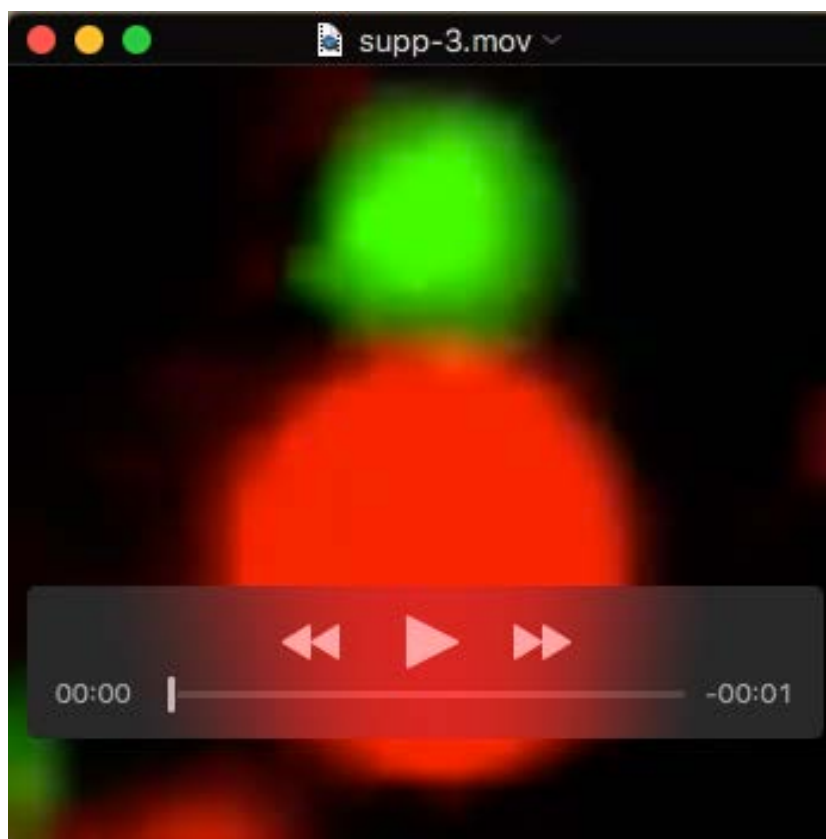

**Movie 3 (related to Figure 3L).**

Dextran-AF555 (Dex555) (red) was internalized by 4 h pulse and 20 h chase into lysosomes of MNT-1 cells overexpressing 2xFYVE-GFP (localized on stage I melanosomes). Then cells were treated for 2 h with DMSO. Movies were taken at a frame rate of 1.4 s and 10 frames are shown.

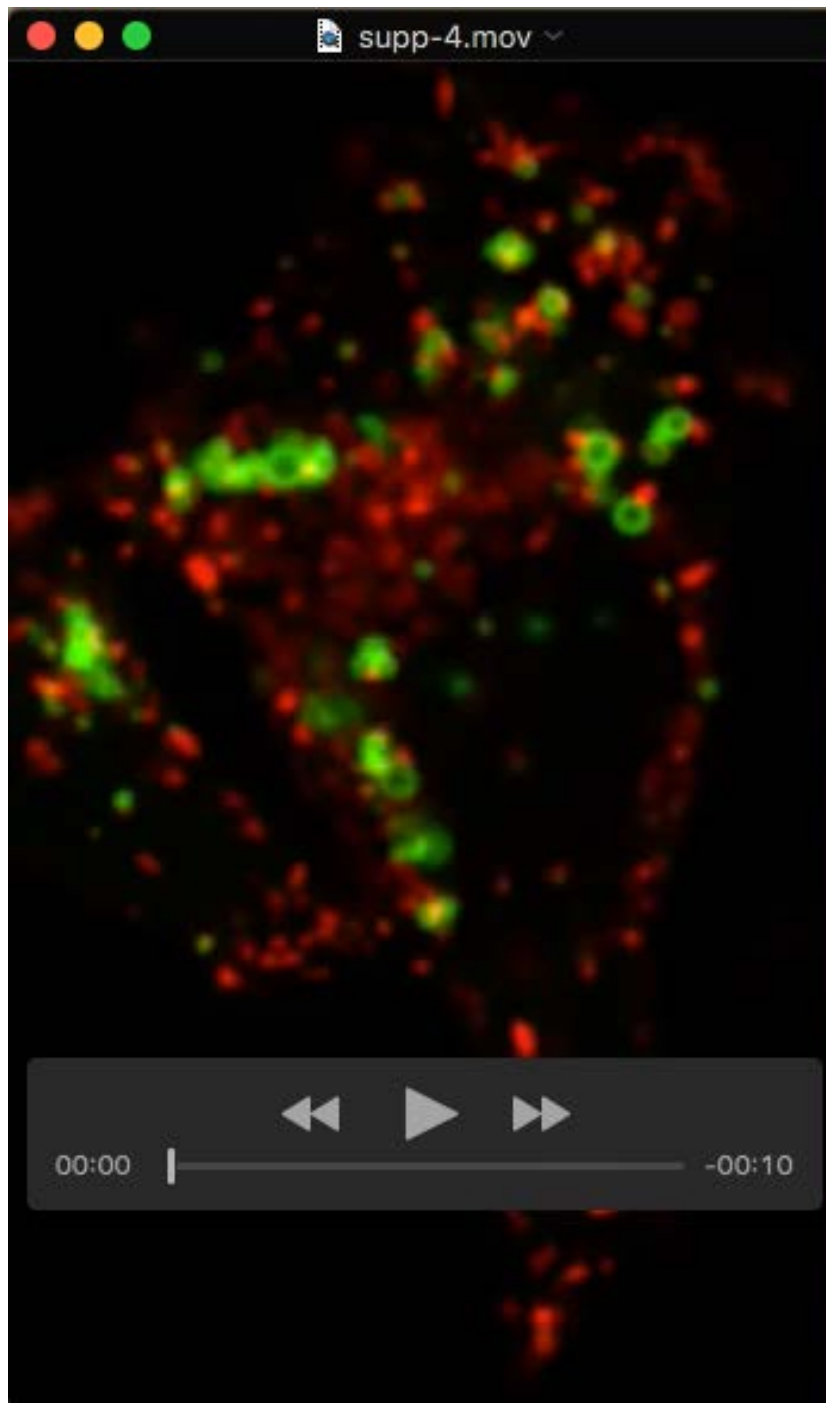

**Movie 4 (related to Figure 3J).**

MNT-1 cells were co-transfected with LAMP1-mRuby2 and 2xFYVE-GFP and treated for 2 h with 1.6  $\mu$ M YM201636. The movie was taken at 0.4 sec frame rate and 100 frames are shown.

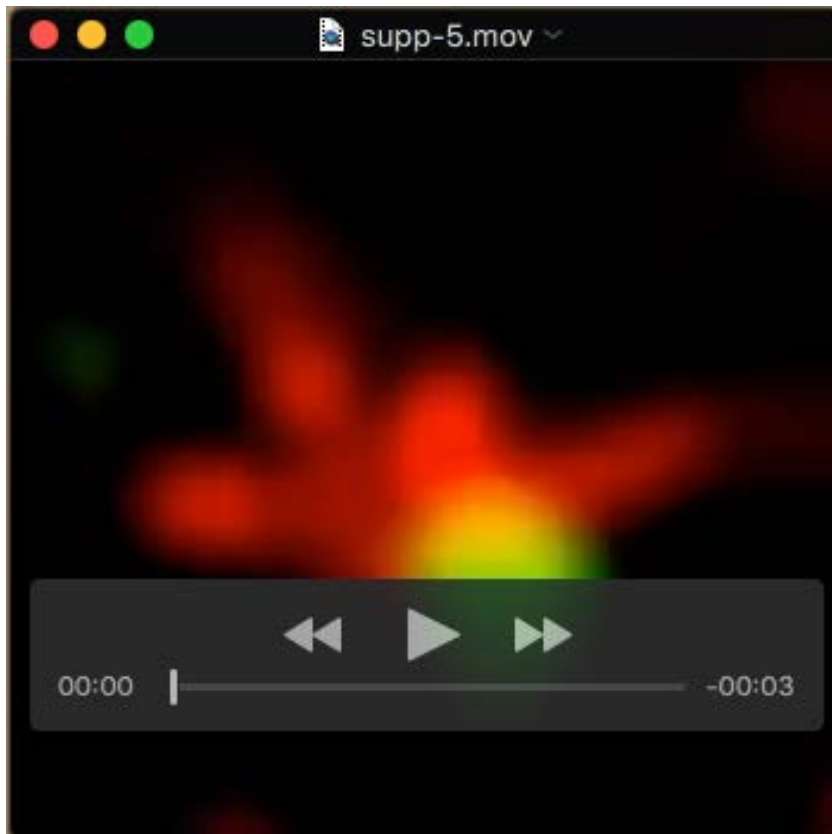

**Movie 5 (related to Figure 3J).**

MNT-1 cells were co-transfected with LAMP1-mRuby2 and 2xFYVE-GFP and treated for 2 h with 1.6  $\mu$ M YM201636. Movie shows magnification of boxed region in Figure 5B. The movie was taken at 0.4 sec frame rate and 30 frames are shown.

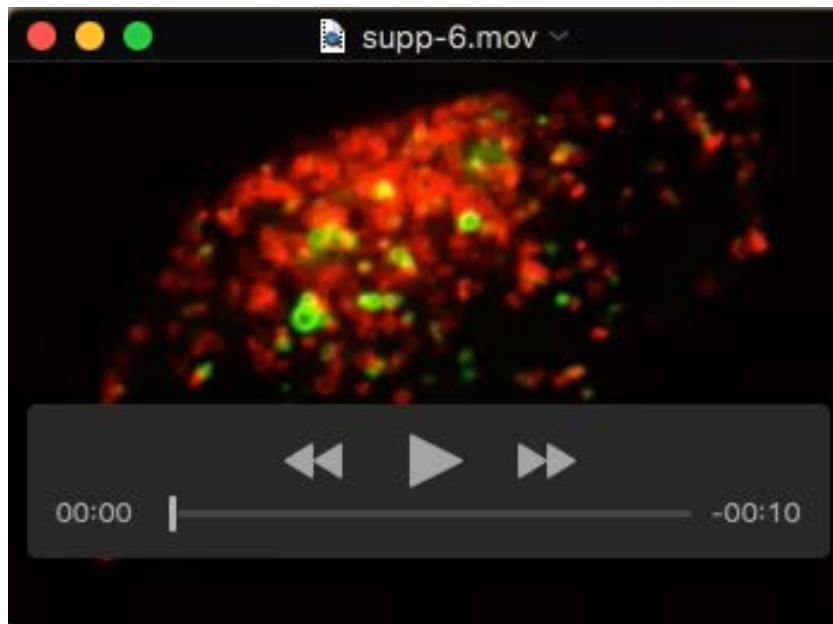

**Movie 6 (related to Figure S3G).**

MNT-1 cells were co-transfected with LAMP1-mRuby2 and 2xFYVE-GFP and treated for 2 h with 1.6  $\mu$ M YM201636 before YM201635 was washed out for 1 h. The movie was taken at 0.4 sec frame rate and 100 frames are shown.

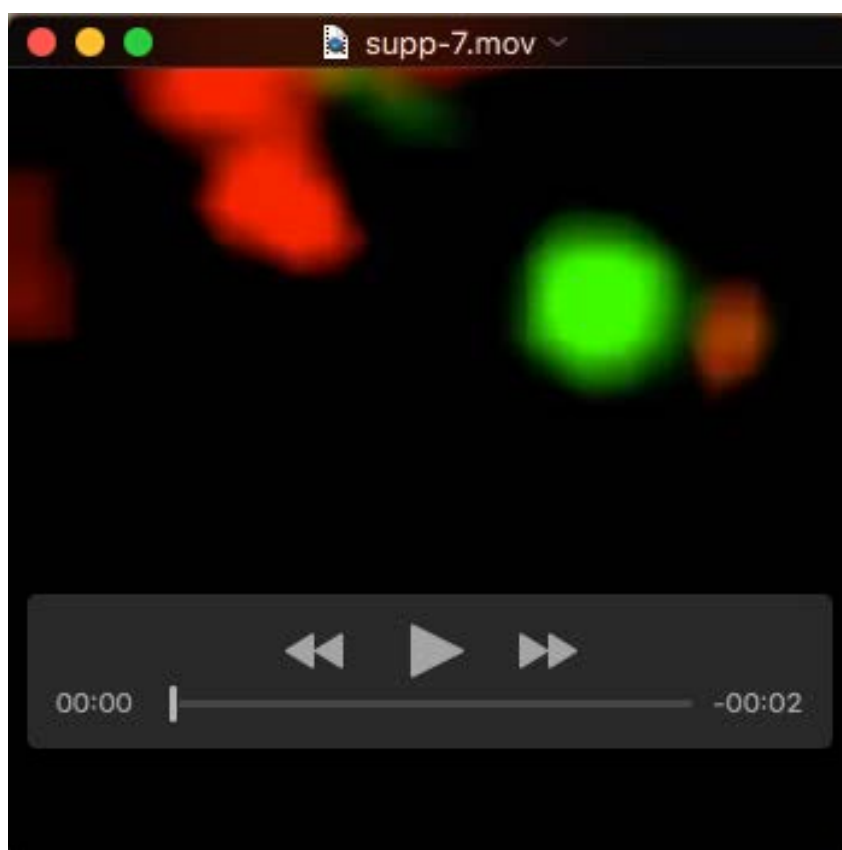

**Movie 7 (related to Figure S3G).**

MNT-1 cells were co-transfected with LAMP1-mRuby2 and 2xFYVE-GFP and treated for 2 h with 1.6  $\mu$ M YM201636 before YM201635 was washed out for 1 h. Movie shows magnification of boxed region in Figure 5C. The movie was taken at 0.4 sec frame rate and 15 frames are shown.

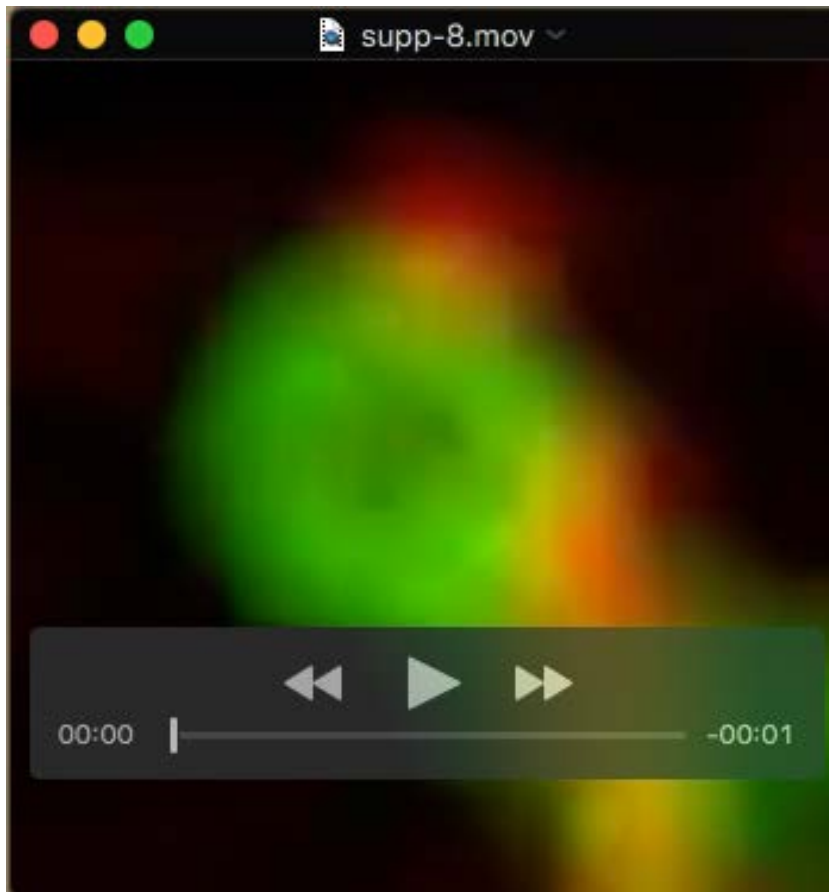

**Movie 8 (related to Figure 3N).**

Dextran-AF555 (Dex555) (red) was internalized by 4 h pulse and 20 h chase into lysosomes of MNT-1 cells overexpressing 2xFYVE-GFP (localized on stage I melanosomes). Then cells were treated for 2 h with 1.6  $\mu$ M YM201636. Movies were taken at a frame rate of 1.4 s and 10 frames are shown.



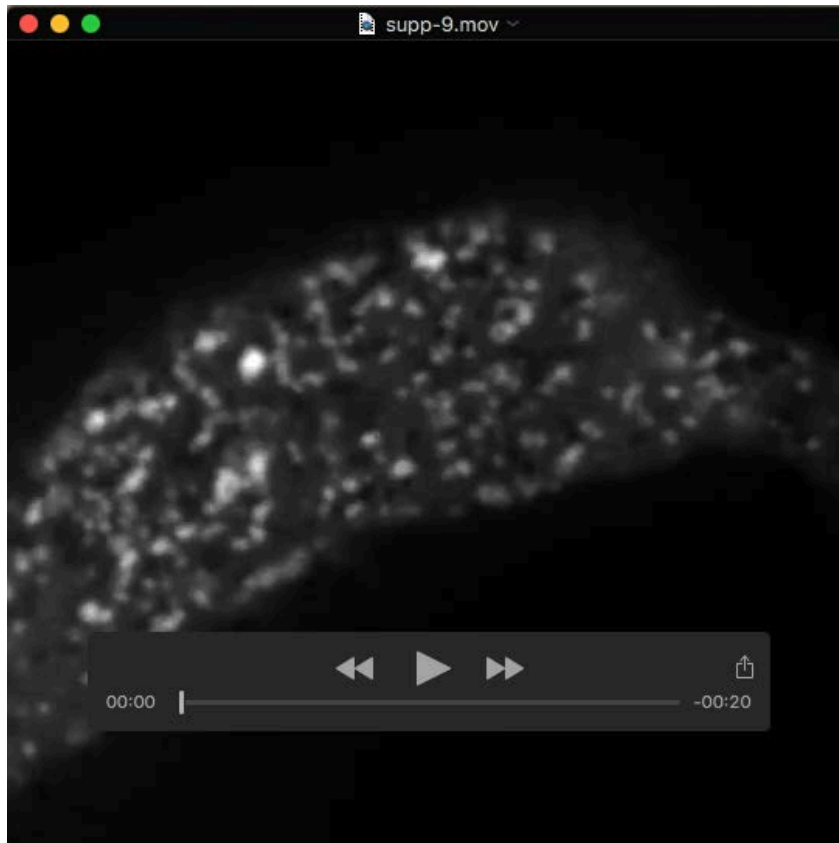

**Movie 9 (related to Figure 5A).**

MNT-1 cells were transfected with 2xFYVE-GFP and treated for 2 h with DMSO. The movie was taken at 0.2 sec frame rate and 200 frames are shown.

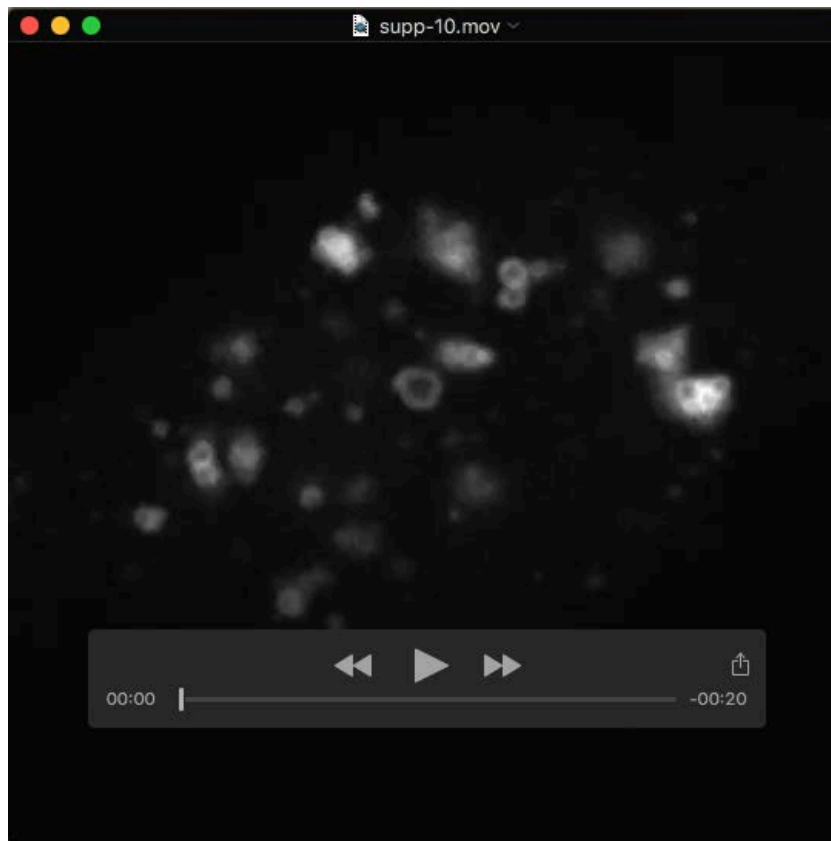

**Movie 10 (related to Figure 5A).**

MNT-1 cells were transfected with 2xFYVE-GFP and treated for 2 h with 1.6  $\mu$ M YM201636. The movie was taken at 0.2 sec frame rate and 200 frames are shown.

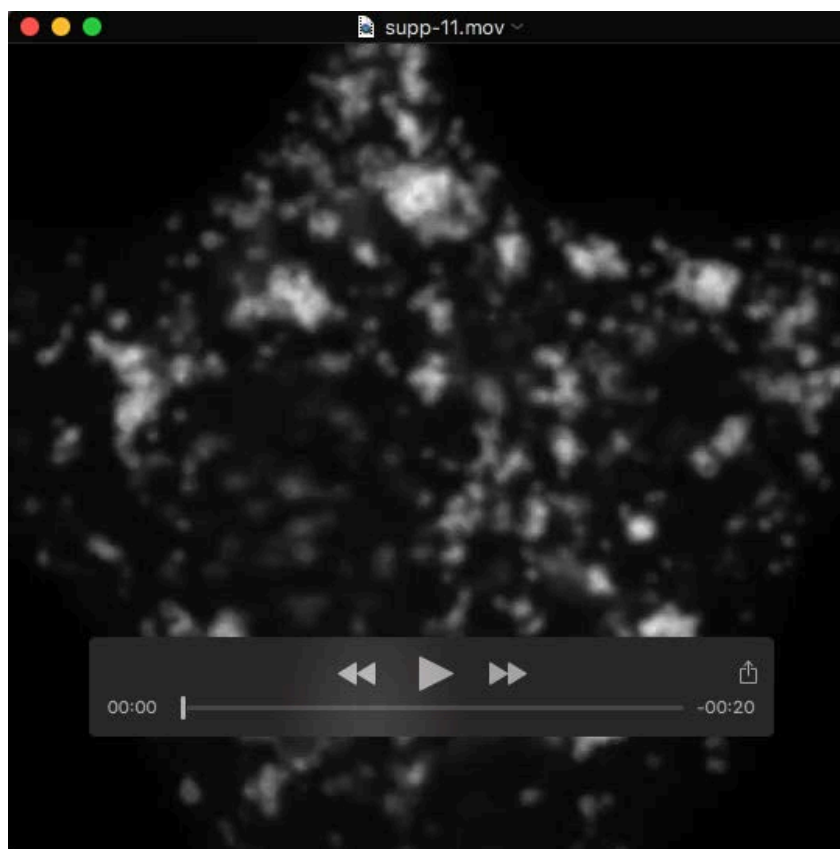

**Movie 11 (related to Figure 5A).**

MNT-1 cells were transfected with 2xFYVE-GFP and treated for 2 h with 1.6  $\mu$ M YM201636 before YM201635 was washed out for 1 h. The movie was taken at 0.2 sec frame rate and 200 frames are shown.

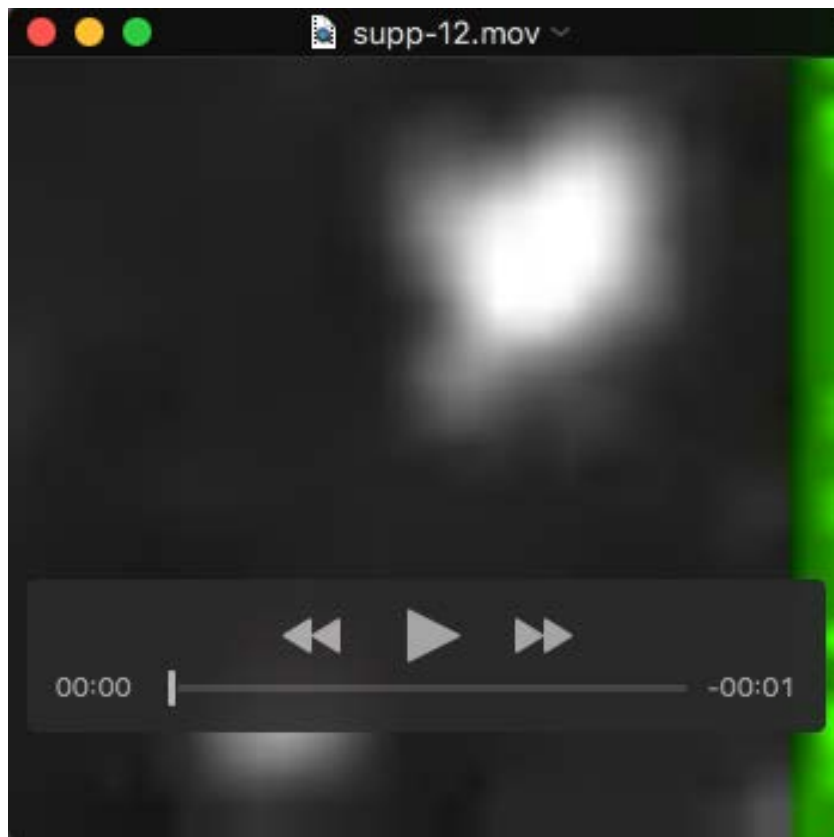

**Movie S12 (related to Figure 6C).**

MNT-1 cells were transfected with 2xFYVE-GFP and treated for 2 h with DMSO. Zoom on 2xFYVE-GFP compartment illustrating membrane budding and release. The movie was taken at 0.2 sec frame rate and 13 frames are shown.

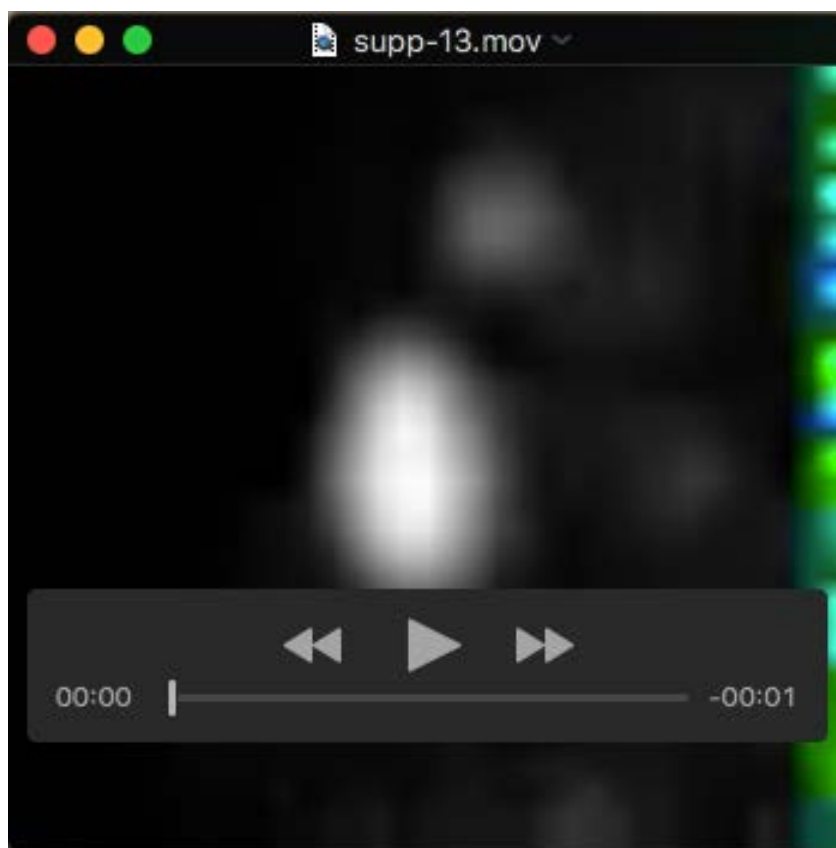

**Movie S13 (related to Figure 6C).**

MNT-1 cells were transfected with 2xFYVE-GFP and treated for 2 h with 200  $\mu$ M CK-666. Zoom on 2xFYVE-GFP compartment illustrating membrane bud formation and retraction. The movie was taken at 0.2 sec frame rate and 13 frames are shown.

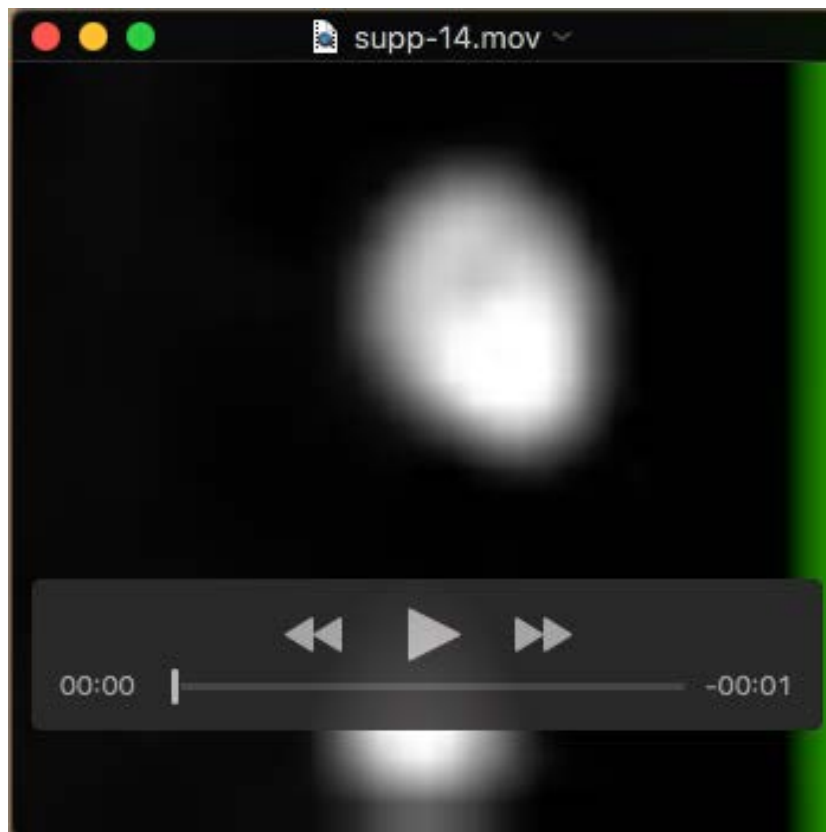

**Movie S14 (related to Figure 6C).**

MNT-1 cells were transfected with 2xFYVE-GFP and treated for 2 h with 1.6  $\mu$ M YM201636 before YM201635 was washed out for 1 h. Zoom on 2xFYVE-GFP compartment illustrating membrane budding and release. The movie was taken at 0.2 sec frame rate and 13 frames are shown.

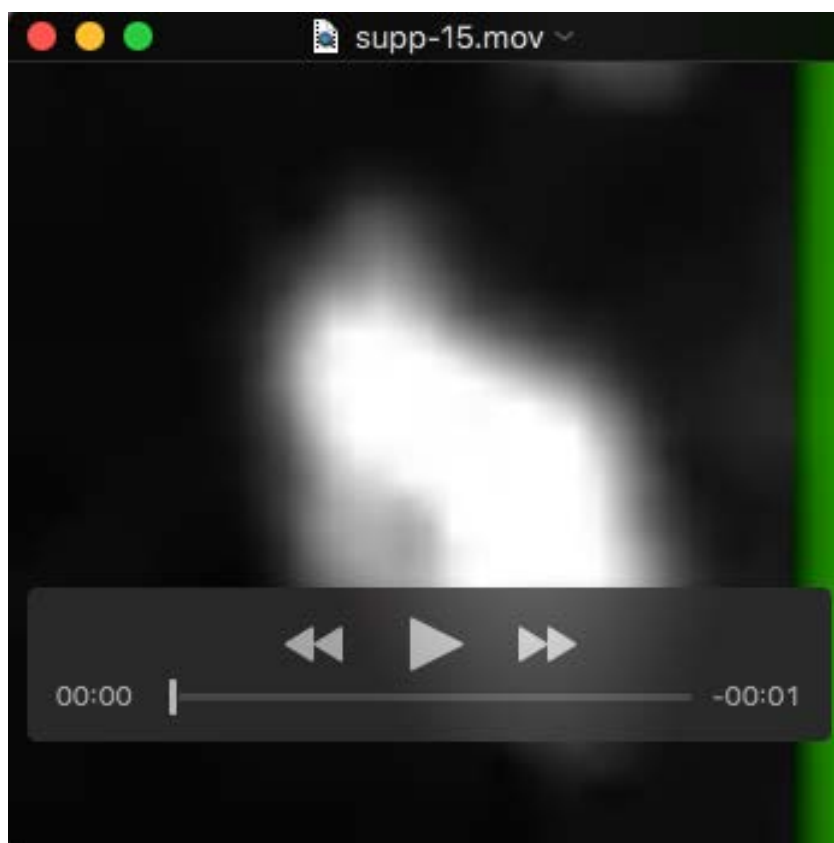

**Movie S15 (related to Figure 6C).**

MNT-1 cells were transfected with 2xFYVE-GFP and treated for 2 h with 1.6  $\mu$ M YM201636 before YM201635 was washed out for 1 h in the presence of 200  $\mu$ M CK-666. Zoom on 2xFYVE-GFP compartment illustrating membrane bud formation and retraction. The movie was taken at 0.2 sec frame rate and 13 frames are shown.
